# Supplementary material for: Microwave shielding properties of Co/Ni attached to single walled carbon nanotubes
Source: Royal Society of Chemistry journal article supplement (doi:10.1039/c5ta02381e), 2015-01-01
Supplement: c5ta02381e1.pdf [file c5ta02381e1.pdf]

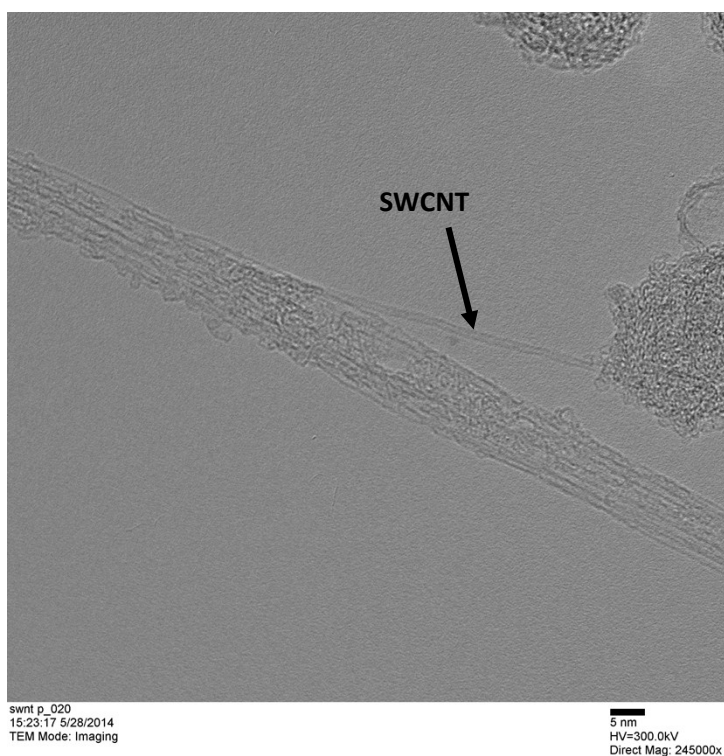

Figure S1: HRTEM image of SWCNT

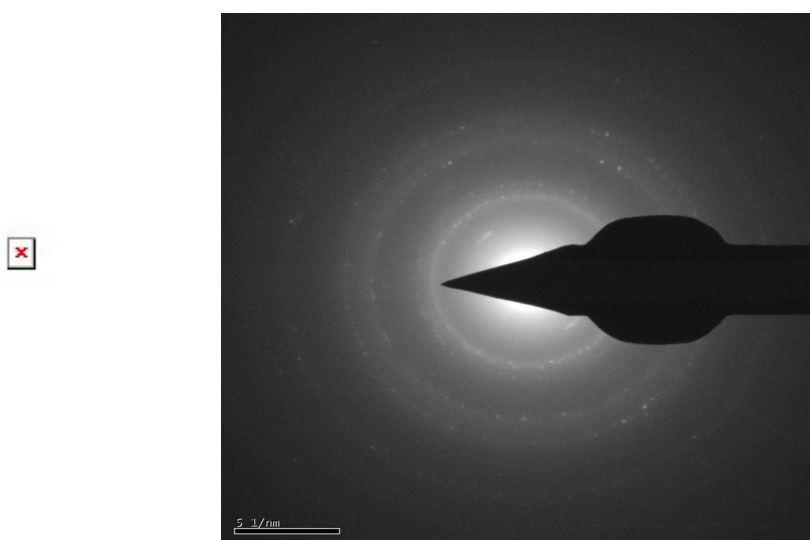

Figure S2: SAED of Co/Ni decorated SWCNT

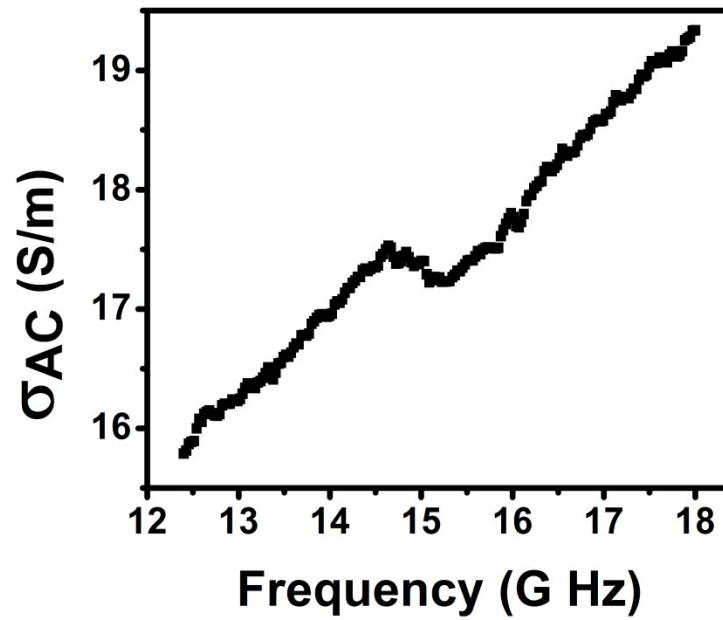

Figure S3: Variation of electrical conductivity with frequency

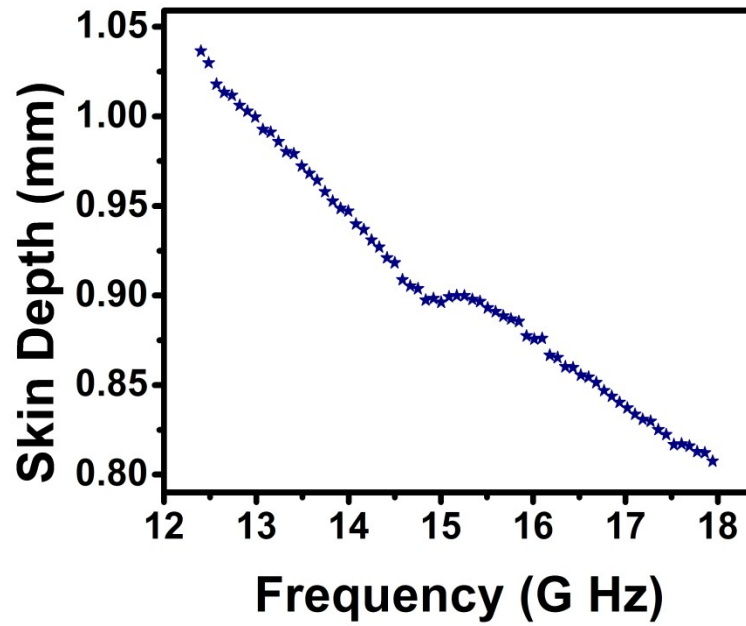

Figure S4: Variation of skin depth with frequency
